# Supplementary material for: Multi-Tissue DNA Methylation Remodeling at Mitochondrial Quality Control Genes According to Diet in Rat Aging Models
Source: MDPI journal article supplement (doi:10.3390/nu12020460), 2020-02-12

Tfam - Transcription factor A, mitochondrial - Chromosome 20: 18593830- 18594066

GGCCTTCCAGCAGAATACTCAGAGGGGCTG**CG**GCTATGG**CGCG**GCTCAGCAACACCCTTGCCAAA  
CTAAAC**CG**GCTCTGCCTAGC**CG**CAGGCTC**CG**CCCCCACTCAGCCC**CG**CCCACTGAAC**CG**GTGGGGGA  
CACACTC**CG**CCTCC**CG**TTTGCCC**CG**CCTCCTGCTGCAGAC**CG**GAAGTCTGGGCCTCCACAGTGCC  
C**CGCGCGCGCGCGCG**GGCATGATAACAAGCCCCTGGAGTA

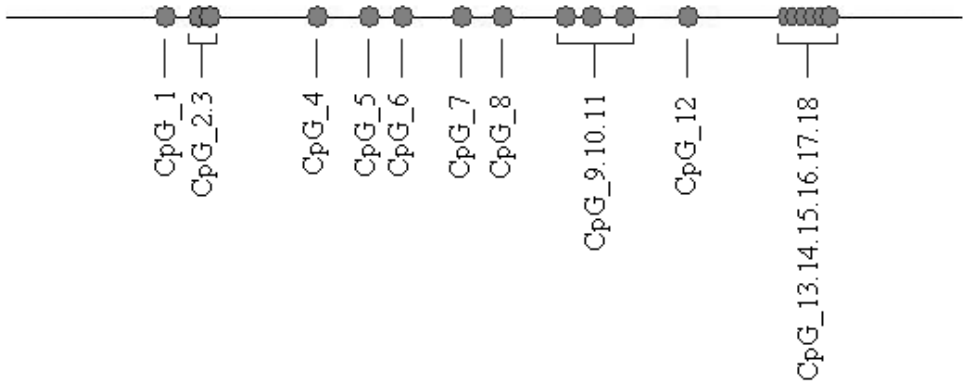

Opa1\_Amplicon1 - Mitochondrial dynamin like GTPase - Chromosome 1: 74793424- 74793585

TGGGCCAAGGCATCAAAAATCCTGTTGAA**CG**GGGAGTGGTCAC**CG**GCCAACCTCC**CG**TCACCTCCTC**C**  
**GG**TACTTAAACATT**CGCG**AGAATTCTCAAAGAGCTC**CG**GCCTGGCCTGAGGGT**CG**GTCACCTGCA  
CATTCAGGAAGTAGTGATGGGTCAACCCC

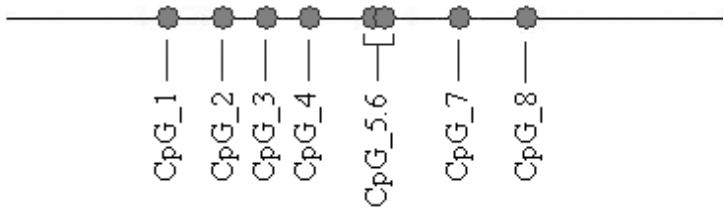

Opa1\_Amplicon2 - Mitochondrial dynamin like GTPase - Chromosome 1: 74793558- 74793769

TTCAGGAAGTAGTGATGGGTCAACCCAC**CG**TCCAGATGGCCCAGAA**CG**TGACATAA**CG**GGGCCAG  
GT**CG**CAGGC**CG**CACTTACCAGGCCAGGGCAGCC**CG**ACCTGCT**CG**CCACATCC**CG**CCAG**CG**CAGACC  
ACACACAGG**CG**C**CG**AGA**CG**GCCA**CG**GGGGAGCCCC**CG**TGT**CG**GGCCCCACTC**CG**ACTCCTGCTCCAGC  
AATGACCCAGGAA

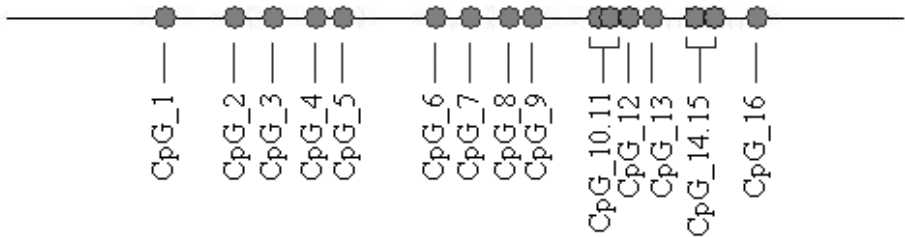

Opa1\_Amplicon3 - Mitochondrial dynamin like GTPase - Chromosome 1: 74793743-74794121

CTCCTGCTCCAGCAATGACCCAGGAAG**CG**GCCCTCAGCAACAAGGGCATAGAGCAGC**CG**C**CG**AGTC  
CCTCCCAATGG**CG**CATGGACTTC**CG**CAAGATC**CG**GCTGGGCTCC**CG**TAGTCAGTC**CG**TCCC**CG**AAA  
TAACCACCTACAGGAA**CG**CTAGGCAGGCTGCACAAATGTGC**CG**CGGATAAC**CG**TG**CG**CGTG**CG**CTAG  
AGCCTGTGGG**CG**GGACTTGTATAGTGCTCCTCCTCTTGCTC**CG**CCCCAAAGTGTC**CG**GGTTGGA  
ATTCTGAAAATAAACTTACCCCATTAAGGATTC**CG**GGAGGTCTGGG**CG**GGCTGGG**CG**CGGGAAATC  
CCCA**CG**ATTAATATTTACTGGAGCAGCCAATATAAGGAGACCTGTTTC

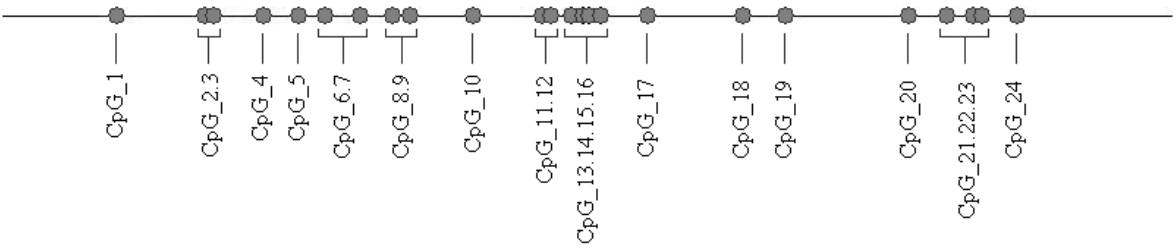

Polg2 - DNA polymerase gamma 2, accessory subunit - Chromosome 10: 94978642-94979091

CCAAAGGTCCAAAGCCTGAGTGGCATC**CG**CTCAGGAGAGCAGC**CG**TGCTGAGCTGCTGTGG**CG**TTC  
**CG**CTGAGAAAGTGCCTCCTC**CG**GCAGAGGTCTACCAG**CG**CCT**CGCG**GGCCAATGCATGCT**CG**GGGT  
**CCG**TAGGCTGCTG**CG**TCCCATCTGTGGGACC**CG**CATATC**CG**GACAGCCAGCACCTGCAGGCCCTGC  
**GGC**AGGCCCTGGCCA**CG**CCACC**CG**AGTGCAT**CG**CTTC**CG**GA**CG**ACT**CG**GGAACAC**CGGCG**CCTCA**CG**TG  
GGAAGC**CG**TCTCTATCCTAAACCAGCACCAAAAGCCTAGGG**CG**CAGG**CGCGGCG**GAAATGAA**CGCG**  
**CCG**CAGACCA**CG**CCCC**CG**GAAGAGCATCACCC**CG**CTGCTGGGC**CG**CAGC**CG**CCTTGGG**CG**TATCC**CG**  
GCCTC**CGCG**GCTGG**CG**CCAG**CG**TTTGTGGTTGTTTACTACCTTGGGGATTTTC

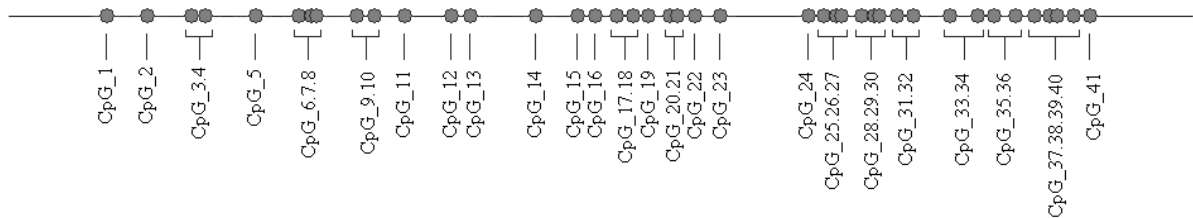

Polg - DNA polymerase gamma, catalytic subunit - Chromosome 1: 141187648-141187891

CAGCATCTGGATGTGCAGAGGGTTGAGC**CG**CAGCTGCCCATTCTCTGAGGAGGGCATTG**CG**ACTG  
**CG**GCTGCC**CG**T**CG**CTGGGGAC**CG**GGGT**CG**AGGA**CG**GAGCTGGAGACCCAG**CG**TCCTGTTGCTGGTAC  
TGGCCCTGAGG**CG**ACTTTGG**CGC****CG**CCACCTTCTTCCAGAGCAGG**CG**GCTCATGGTTGGTGCAGG  
GAGCCCCC**CG**CTGTGAGT**CG**GGACACCTGGCTTTGGGCTCCAGCT

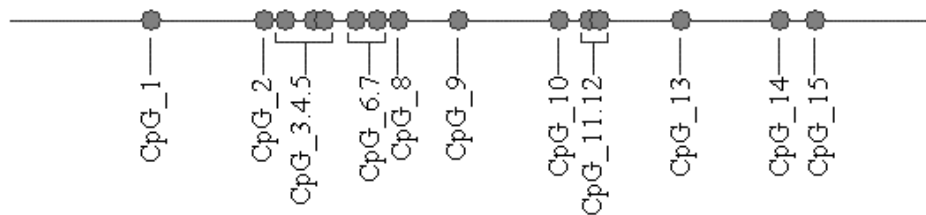

Fis1\_Amplicon1 - Fission, mitochondrial 1 - Chromosome 12: 22765212-22765439

TTTCTGACAAAGGACAGTCCCAAGAGGCCAGCCTC**CG**GGTAGAAGAAGTAA**CG**GCAGG**CG**TTACAG  
AAAGCA**CG**CTTGGGTCCCTCTGGGAAGCCTGAATTT**CG**GGTAG**CG**CCTCCTTAGGGGCTTCTCTA  
GGAAGT**CG**GCT**CG**ATGCTCTGGAGGACC**CG**GAGCTGATCCACTGGGAAGAG**CG**AGGTATTGAGTCT  
G**CG**CAGTAGCTGGCCTTCAAAGAGGGGTG

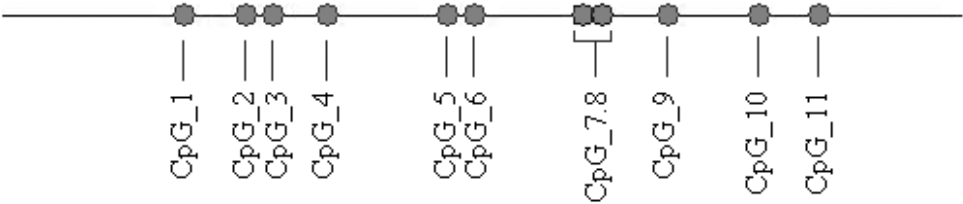

Fis1\_Amplicon2 - Fission, mitochondrial 1 - Chromosome 12: 22765324-22765561

CCTCCTTAGGGGCTTCTCTAGGAAGT**CG**GCT**CG**ATGCTCTGGAGGACC**CG**GAGCTGATCCACTGGG  
AAGAG**CG**AGGTATTGAGTCTG**CG**CAGTAGCTGGCCTTCAAAGAGGGGTGGGG**CG**AG**CG**GGGCCAA  
GGG**CG**GAG**CG**AGAGGACTG**CG**CTGACCAGTGAA**CGCGCG**CTGCTCTACAAGGGG**CG**GGG**CG**ACACT  
AGGAGGG**CG**GGG**CGCG**ACTGGATGCTGGAAAGAGGGTCTC

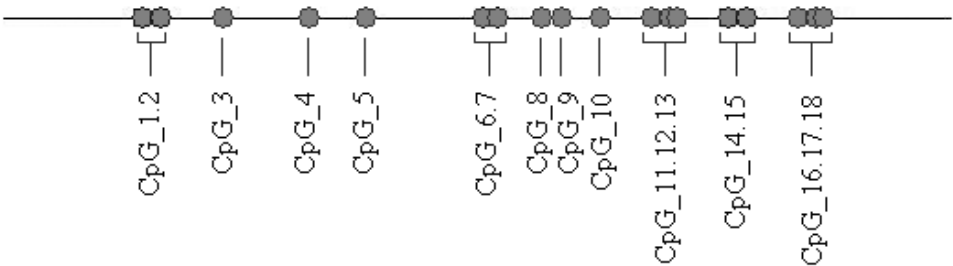

Supplement: s1 [file s1]
